# Supplementary material for: Reducing risks by transforming landscapes: Cross-scale effects of land-use changes on ecosystem services
Source: PLoS One. 2018 Apr 24;13(4):e0195895. doi: 10.1371/journal.pone.0195895 (PMC5916864; doi:10.1371/journal.pone.0195895)
Supplement: S1 Table — Top 3 and other unranked drivers of change in each study site identified by local communities (L1-4). (XLSX) [file pone.0195895.s001.xlsx]

## Sheet: Sheet1
	Drivers of changes
		L1	L2	L3	L4
	Top1	floods (2012)	floods (2012)	wildlife damages (2014)	wildlife damages (2014)
	Top2	drought (2014)	drought (2014)	drought (2011/12)	drought (2011/12)
	Top3	cattle disease (2013)	chikungunya disease (2010)	rice disease (2013)	rice disease (2013)
	-	chikungunya disease (2010)	traditional gold mining (>1995)	community foret certification (2004)	landslides (2012)
	-	Improve in infastructure (2005-10) e.g. bridge, road, water sytem	improve infrastructure (1995-2010) bridge, road, water system	floods (2008)	floods (2008)
	-	scarcity of Borneo Ironwood (>2013)	end of logging company operations (1985)	infastruture water system (2006)	Illigal logging (2000s)
	-	new village by splitting (2011)	new village and leader (2010)	NGO techncal support for natural resources (2000s)	conversion of forest to pine by state (1990-200)
	-	landslides	village rule to ban deforestation (2011)	increase migration (>1980)	increase migration (>1980)
	-	machines for gold mining and river sedimentatin (>2013)	illigal logging and natural resource scaricty (2011)
	-	village hamlet relocation	village reolocation (1994)
	-	rubber prices increase/decrease	rubber prices increase/decrease
